# Supplementary material for: MIL-88B(Fe)-NH2: an amine-functionalized metal–organic framework for application in a sensitive electrochemical sensor for Cd2+, Pb2+, and Cu2+ ion detection
Source: Royal Society of Chemistry journal article supplement (doi:10.1039/d3ra02828c), 2023-01-01
Supplement: d3ra02828c1.pdf [file d3ra02828c1.pdf]

## ELECTRONIC SUPPLEMENTARY INFORMATION

for

### **MIL-88B(Fe)-NH<sub>2</sub>: An Amine Functionalized Metal-Organic Framework for Applied in a Sensitive Electrochemical Sensor for Cd<sup>2+</sup>, Pb<sup>2+</sup>, and Cu<sup>2+</sup> Ions Detection**

**Luyen T. Tran, Hue T. M. Dang\*, Hoang V. Tran\*, Giang T. L. Hoang, Chinh D. Huynh**

*School of Chemical Engineering, Hanoi University of Science and Technology, 1 Dai Co Viet*

*Road, Hai Ba Trung District, Hanoi 100000, Vietnam*

**Table SI.1.** Average particle sizes of MIL-88B(Fe)-NH<sub>2</sub>(1.5) and MIL-88B(Fe)-NH<sub>2</sub>(2.0).

| Average values         | MIL-88B(Fe)-NH <sub>2</sub> (1.5) | MIL-88B(Fe)-NH <sub>2</sub> (2.0) |
|------------------------|-----------------------------------|-----------------------------------|
| Width (nm)             | 414.3                             | 377.5                             |
| The length/width ratio | 3.97                              | 3.81                              |

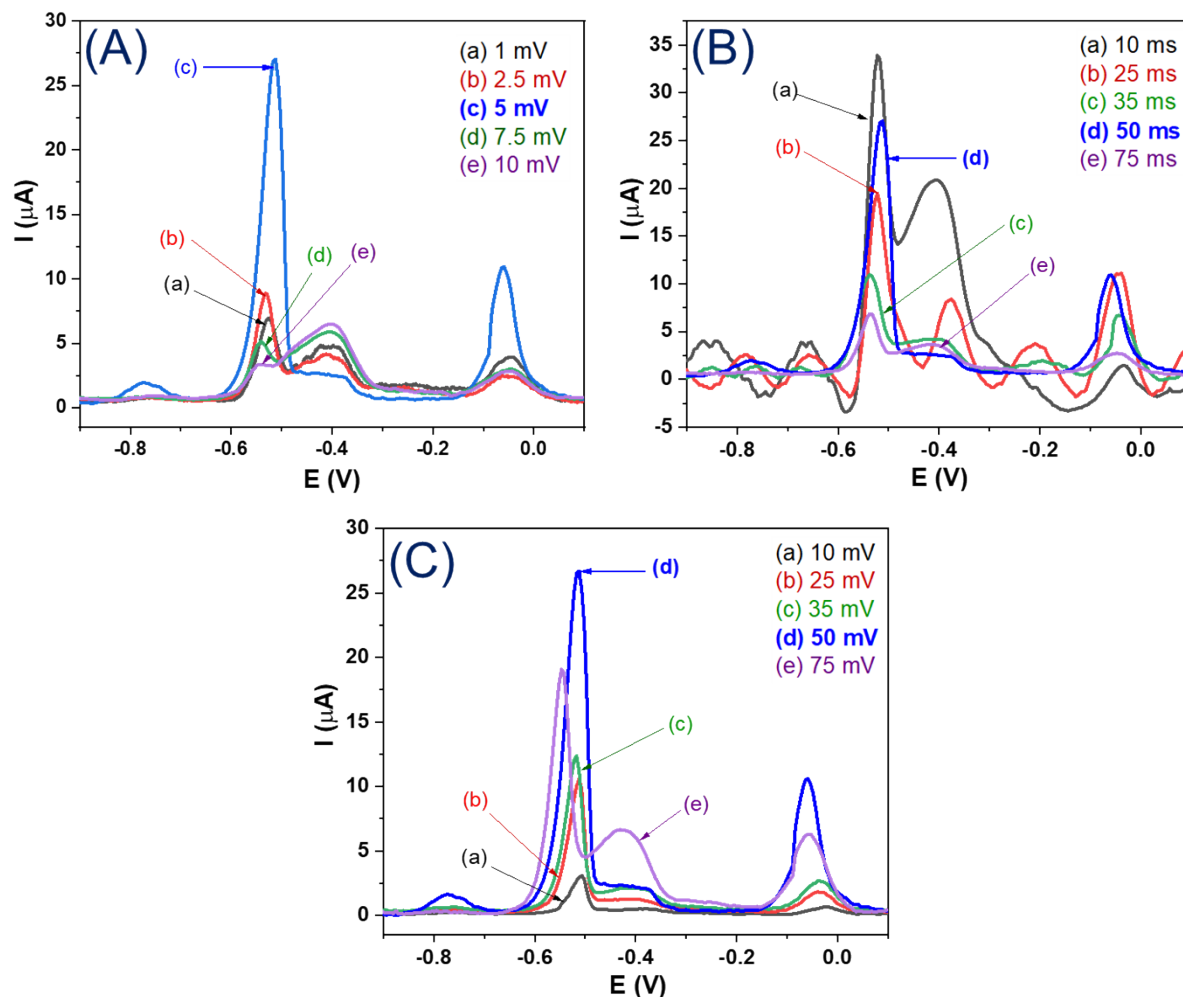

**Figure 1S.** DPV results of GCE/MIL-88B(Fe)-NH<sub>2</sub> electrodes in 0.1 M ABS (pH = 6.0) solutions containing 10  $\mu\text{M}$  Cd<sup>2+</sup>, 10  $\mu\text{M}$  Pb<sup>2+</sup>, and 10  $\mu\text{M}$  Cu<sup>2+</sup> with differential measuring conditions: (A) the change in potential step ((a):1, (b): 2.5, (c): 5, (d): 7.5, and (e): 10 mV) keeping pulse amplitude of 50 mV and pulse width of 50 ms; (B) the change in pulse width ((a):10, (b): 25, (c): 35, (d): 50, and (e): 75 ms) keeping potential step of 5 mV and pulse amplitude of 50 mV; and (C) the change in pulse amplitude ((a):10, (b): 25, (c): 35, (d): 50, and (e): 75 mV) keeping potential step of 5 mV and pulse width of 50 ms.

DPV measurements of the GCE/MIL-88B(Fe)-NH<sub>2</sub> electrodes were performed in 0.1 M ABS (pH = 6.0) solutions containing 10  $\mu\text{M}$  Cd<sup>2+</sup>, 10  $\mu\text{M}$  Pb<sup>2+</sup>, and 10  $\mu\text{M}$  Cu<sup>2+</sup> with differential

measuring conditions including potential step, pulse width, and pulse amplitude, in order to investigate optimization studies for DPV, and the obtained results are described in **Fig. 1S (A, B, and C, respectively)**. As can be seen in **Fig. 1S (A, B, and C)**, when the potential step is 5 mV, the pulse width is 50 ms, and the pulse amplitude is 50 mV, the obtained DPV signal is best for both  $\text{Cd}^{2+}$ ,  $\text{Pb}^{2+}$ , and  $\text{Cu}^{2+}$ . Therefore, in this work, the above measuring conditions were selected for DPV measurements.

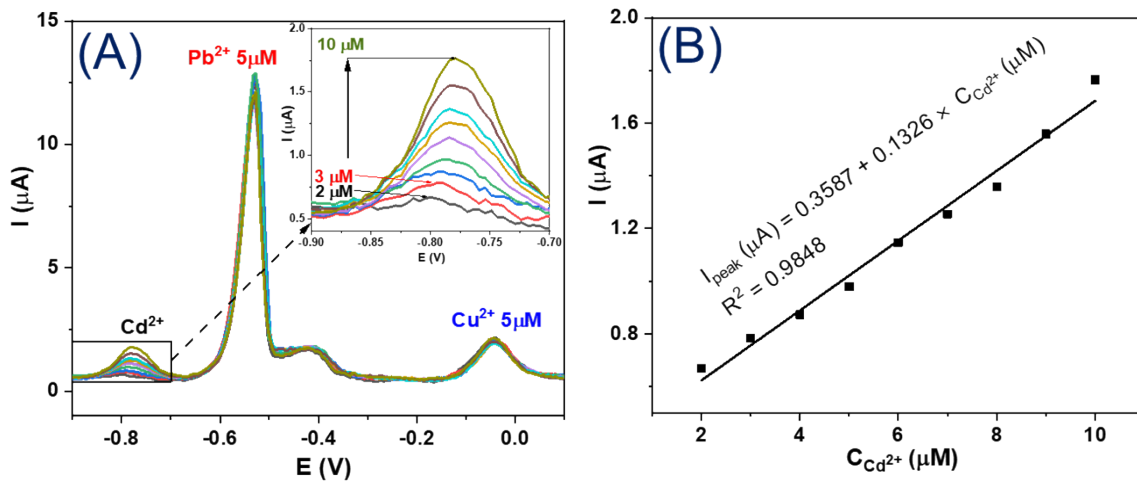

**Figure 2S.** (A) DPV results of GCE/MIL-88B(Fe)- $\text{NH}_2$  electrodes in 0.1 M ABS (pH = 6.0) solutions containing 5  $\mu\text{M}$   $\text{Pb}^{2+}$ , 5  $\mu\text{M}$   $\text{Cu}^{2+}$ , and  $\text{Cd}^{2+}$  with concentrations increasing from 2  $\mu\text{M}$  to 10  $\mu\text{M}$ ; and (B) the linear relationship between the output signal of the sensor and the concentration of  $\text{Cd}^{2+}$ .

The DPV results of GCE/MIL-88B(Fe)- $\text{NH}_2$  electrodes in different solutions containing 5  $\mu\text{M}$   $\text{Pb}^{2+}$  + 5  $\mu\text{M}$   $\text{Cu}^{2+}$ , and  $\text{Cd}^{2+}$  with concentrations increasing from 2  $\mu\text{M}$  to 10  $\mu\text{M}$ , and the corresponding calibration plot of  $\text{Cd}^{2+}$ , which are exhibited in **Fig. 2SA** and **Fig. 2SB**, respectively, clearly demonstrate the ability of the obtained sensor to detect the ions in the desired ranges of detection.
